# Supplementary material for: In situ combined analysis of gases and electrochemical signals of an activated carbon-based supercapacitor at 2.7–4 V
Source: Royal Society of Chemistry journal article supplement (doi:10.1039/c8ra06568c), 2018-01-01
Supplement: c8ra06568c1.pdf [file c8ra06568c1.pdf]

## Supporting information

### In situ combined analysis of gases and electrochemical signals of an activated carbon-based supercapacitor at 2.7-4V

Jie Li, Zhou Xu\* and ZhiAn Zhang\*

SI-1 CV curves and EIS curves at 3.5V under different current densities

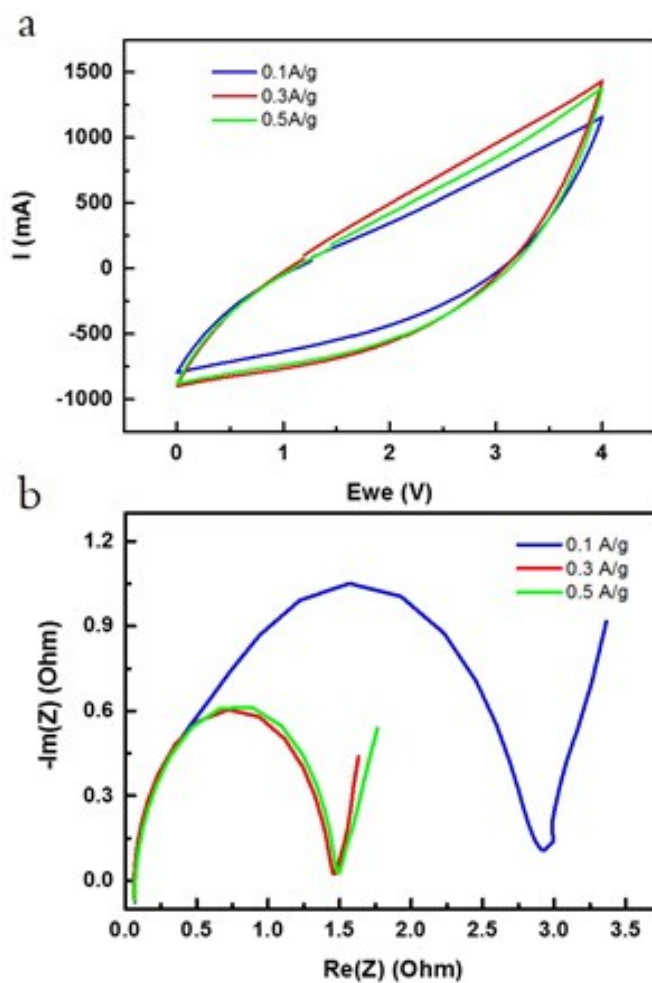

Figure SI-1. (a) EIS data at different potentials, as remaining the current density of 0.1 A/g.

(b) EIS data at different current densities, as remaining the potentials at 3.5V.

SI-2 Galvanostatic charge and discharge curves at 2.7V, 3V and 3.5V

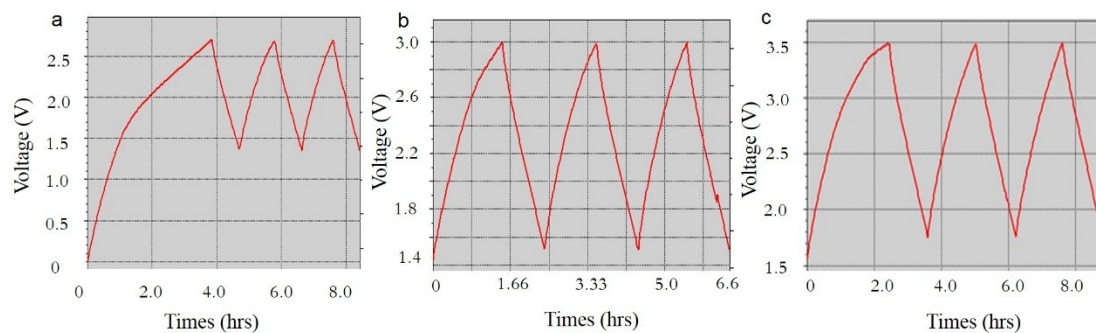

Fig.SI-2 Galvanostatic charge and discharge curves at 2.7V(a), 3V(b) and 3.5V(c)
